# Supplementary material for: A comparison study of sodium ion- and potassium ion-modified graphitic carbon nitride for photocatalytic hydrogen evolution
Source: Royal Society of Chemistry journal article supplement (doi:10.1039/d1ra01395e), 2021-01-01
Supplement: d1ra01395e1.pdf [file d1ra01395e1.pdf]

Supporting Information for  
**A Comparison Study of Sodium ion and Potassium ion Modified  
Graphitic Carbon Nitride for Photocatalytic Hydrogen Evolution**

Siyu Hu, Anchi Yu\* and Rong Lu\*

*Department of Chemistry, Renmin University of China, Beijing 100872, P. R. China*

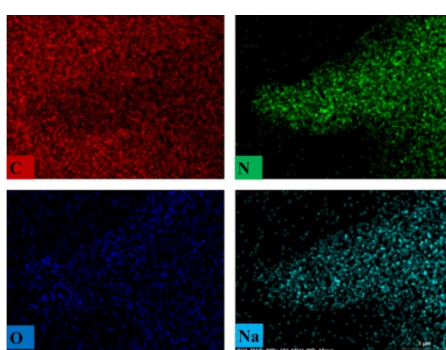

Fig. S1: Element mapping images of GCN-Na-5.

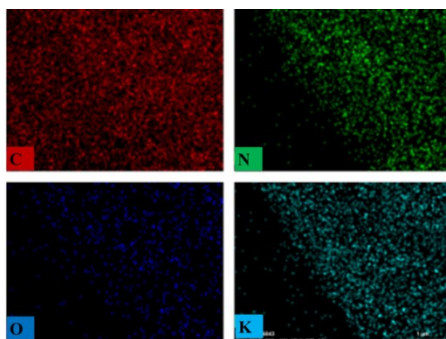

Fig. S2: Element mapping images of GCN-K-5.

Table S1: BET surface area, average pore diameter and pore volume for each sample.

| Sample     | $S_{\text{BET}}(\text{m}^2/\text{g})$ | Average pore diameter(nm) | Pore volume( $\text{cm}^3/\text{g}$ ) |
|------------|---------------------------------------|---------------------------|---------------------------------------|
| GCN        | 10.40                                 | 20.78                     | 0.054                                 |
| GCN-Na-0.5 | 6.81                                  | 16.75                     | 0.029                                 |
| GCN-Na-5   | 10.30                                 | 13.74                     | 0.035                                 |
| GCN-K-0.5  | 6.30                                  | 14.03                     | 0.023                                 |
| GCN-K-5    | 7.02                                  | 11.63                     | 0.020                                 |

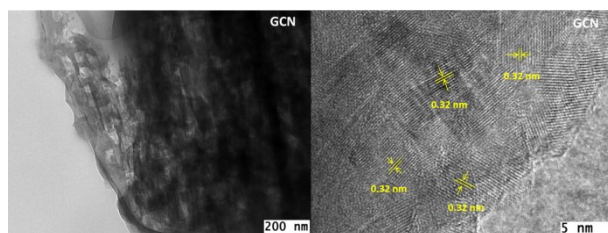

Fig. S3: TEM and high resolution TEM images of GCN.

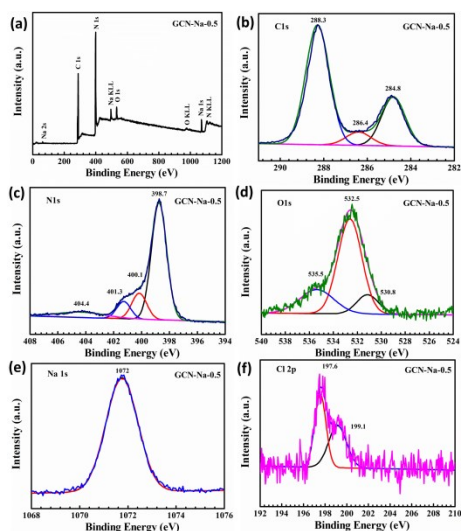

Fig. S4: XPS spectrum of GCN-Na-0.5 (a). High resolution XPS spectra of C 1s (b), N 1s (c), O 1s (d), Na 1s (e) and Cl 1s (f) for GCN-Na-0.5.

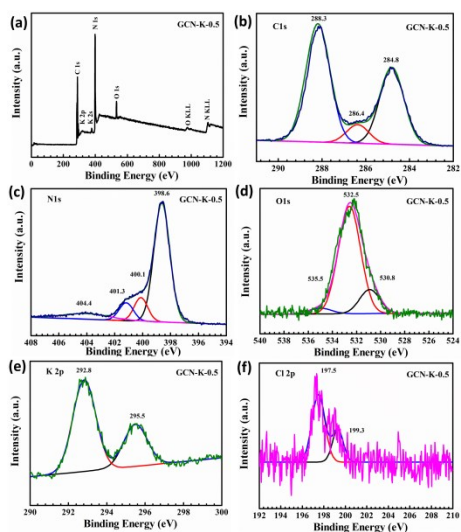

Fig. S5: XPS spectrum of GCN-K-0.5 (a). High resolution XPS spectra of C 1s (b), N 1s (c), O 1s (d), K 2p (e) and Cl 1s (f) for GCN-K-0.5.

Table S2: Elemental composition according to EDS measurements.

| Sample     | C/N(at.) | Na(at.%) | K(at.%) | O(at.%) |
|------------|----------|----------|---------|---------|
| GCN        | 0.659    | --       | --      | 2.85    |
| GCN-Na-0.5 | 0.670    | 2.46     | --      | 3.97    |
| GCN-Na-5   | 0.687    | 2.49     | --      | 5.75    |
| GCN-K-0.5  | 0.682    | --       | 2.47    | 4.58    |
| GCN-K-5    | 0.706    | --       | 3.01    | 5.76    |

Table S3: XPS elemental composition analysis.

| Sample     | C 1s<br>(at.%) | N 1s<br>(at.%) | O 1s<br>(at.%) | K 2p<br>(at.%) | Na 1s<br>(at.%) | Cl 2p<br>(at.%) |
|------------|----------------|----------------|----------------|----------------|-----------------|-----------------|
| GCN        | 43.74          | 54.64          | 1.62           | --             | --              | --              |
| GCN-Na-0.5 | 49.65          | 45.69          | 2.86           | --             | 1.64            | 0.15            |
| GCN-Na-5   | 45.09          | 51             | 1.73           | --             | 2.08            | 0.1             |
| GCN-K-0.5  | 51.57          | 41.07          | 4.77           | 2.35           | --              | 0.1             |
| GCN-K-5    | 46.07          | 48.11          | 2.85           | 2.91           | --              | 0.06            |

Table S4: Elemental analysis data for each sample.

| Sample     | C (wt.%) | N (wt.%) | H (wt.%) | C/N (mol ratio) | Average(mol ratio) |
|------------|----------|----------|----------|-----------------|--------------------|
| GCN        | 34.45    | 60.92    | 1.85     | 0.653           | 0.657±0.005        |
|            | 34.45    | 60.86    | 1.81     | 0.660           |                    |
| GCN-Na-0.5 | 31.91    | 55.38    | 1.62     | 0.672           | 0.673±0.001        |
|            | 31.91    | 55.29    | 1.65     | 0.673           |                    |
| GCN-Na-5   | 30.13    | 51.52    | 1.90     | 0.683           | 0.683±0.000        |
|            | 30.13    | 51.53    | 1.92     | 0.683           |                    |
| GCN-K-0.5  | 29.88    | 50.87    | 1.52     | 0.674           | 0.680±0.008        |
|            | 29.86    | 50.79    | 1.45     | 0.686           |                    |
| GCN-K-5    | 28.70    | 48.18    | 1.66     | 0.695           | 0.695±0.000        |
|            | 28.74    | 48.25    | 1.51     | 0.695           |                    |

Table S5: ICP-AES data for each sample.

| Sample     | Number of Experiments |       |       | Na(wt.%)   | K(wt.%)     |
|------------|-----------------------|-------|-------|------------|-------------|
|            | 1                     | 2     | 3     |            |             |
| GCN        |                       |       |       | --         | --          |
| GCN-Na-0.5 | 4.48                  | 4.54  | 3.62  | 4.21±0.515 | --          |
| GCN-Na-5   | 5.20                  | 5.32  | 5.68  | 5.40±0.250 | --          |
| GCN-K-0.5  | 10.36                 | 10.26 | 10.53 |            | 10.38±0.137 |
| GCN-K-5    | 11.06                 | 11.19 | 11.62 |            | 11.29±0.293 |

Table S6: The derived band gap data for each sample.

| Sample     | Bandgap(eV) | Average(eV)      |
|------------|-------------|------------------|
| GCN        | 2.80        | $2.80 \pm 0.007$ |
|            | 2.81        |                  |
|            | 2.80        |                  |
| GCN-Na-0.5 | 2.75        | $2.76 \pm 0.012$ |
|            | 2.77        |                  |
|            | 2.75        |                  |
| GCN-Na-5   | 2.79        | $2.80 \pm 0.016$ |
|            | 2.82        |                  |
|            | 2.80        |                  |
| GCN-K-0.5  | 2.76        | $2.75 \pm 0.07$  |
|            | 2.75        |                  |
|            | 2.75        |                  |
| GCN-K-5    | 2.78        | $2.78 \pm 0.07$  |
|            | 2.77        |                  |
|            | 2.78        |                  |

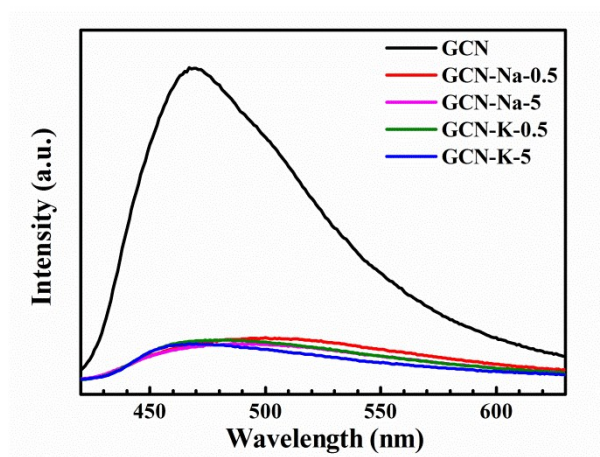

Fig. S6: Fluorescence spectra of GCN, GCN-Na-0.5, GCN-Na-5, GCN-K-0.5 and GCN-K-5. The excitation wavelength is 370 nm.

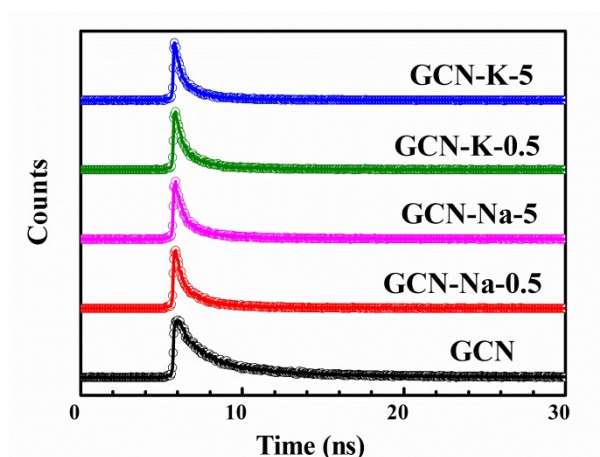

Fig. S7: Fluorescence decays of GCN, GCN-Na-0.5, GCN-Na-5, GCN-K-0.5 and GCN-K-5. Excitation wavelength, 375 nm; detection wavelength, 470 nm.

Table S7: The fitting parameters of fluorescence decay with bi-exponential function.

| $\lambda_{\text{ex}}$ (nm) | Sample     | $a_1$  | $\tau_1$ (ns) | $a_2$  | $\tau_2$ (ns) | $\langle\tau\rangle$ (ns) |
|----------------------------|------------|--------|---------------|--------|---------------|---------------------------|
| 375                        | GCN        | 0.4485 | 1.5375        | 0.5515 | 6.6826        | 4.375                     |
|                            | GCN-Na-0.5 | 0.5669 | 0.7653        | 0.4331 | 4.206         | 2.256                     |
|                            | GCN-Na-5   | 0.5625 | 0.6929        | 0.4375 | 3.807         | 2.055                     |
|                            | GCN-K-0.5  | 0.5565 | 0.6628        | 0.4435 | 3.504         | 1.923                     |
|                            | GCN-K-5    | 0.5855 | 0.6345        | 0.4145 | 3.515         | 1.828                     |

Table S8: Photocatalytic H<sub>2</sub> evolution rate for different samples.

| Sample     | H <sub>2</sub> evolution<br>$\lambda > 420$ nm ( $\mu\text{molh}^{-1}$ ) | Average<br>$\lambda > 420$ nm ( $\mu\text{molh}^{-1}$ ) |
|------------|--------------------------------------------------------------------------|---------------------------------------------------------|
| GCN        | 4.78                                                                     | $4.76 \pm 0.038$                                        |
|            | 4.79                                                                     |                                                         |
|            | 4.72                                                                     |                                                         |
| GCN-Na-0.5 | 3.28                                                                     | $3.69 \pm 0.379$                                        |
|            | 4.03                                                                     |                                                         |
|            | 3.75                                                                     |                                                         |
| GCN-Na-5   | 7.32                                                                     | $7.29 \pm 0.058$                                        |
|            | 7.22                                                                     |                                                         |
|            | 7.32                                                                     |                                                         |
| GCN-K-0.5  | 10.6                                                                     | $10.2 \pm 0.432$                                        |
|            | 9.75                                                                     |                                                         |
|            | 10.3                                                                     |                                                         |
| GCN-K-5    | 32.2                                                                     | $30.3 \pm 2.004$                                        |
|            | 30.4                                                                     |                                                         |
|            | 28.2                                                                     |                                                         |
